# Supplementary material for: Selective hydrogenolysis of furfural into fuel-additive 2-methylfuran over a rhenium-promoted copper catalyst
Source: Royal Society of Chemistry journal article supplement (doi:10.1039/d1se00036e), 2021-01-01
Supplement: d1se00036e1.pdf [file d1se00036e1.pdf]

## Supplementary Information

### Selective hydrogenolysis of furfural into fuel-additive 2-methylfuran over rhenium-promoted copper catalyst

Jirawat Chuseang <sup>a</sup>, Rapeepong Nakwachara <sup>a</sup>, Munsuree Kalong <sup>a</sup>, Sakhon Ratchahat <sup>a</sup>, Wanida Koo-amornpattana <sup>a</sup>, Wantana Klysubun <sup>b</sup>, Pongtanawat Khemthong <sup>c</sup>, Kajornsak Faungnawakij <sup>c</sup>, Suttichai Assabumrungrat <sup>d,e</sup>, Vorranutch Itthibenchapong <sup>c</sup>, and Atthapon Srifa <sup>a,\*</sup>

<sup>a</sup> Department of Chemical Engineering, Faculty of Engineering, Mahidol University, Nakhon Pathom 73170, Thailand

<sup>b</sup> Synchrotron Light Research Institute, Nakhon Ratchasima, 30000, Thailand

<sup>c</sup> National Nanotechnology Center (NANOTEC), National Science and Technology Development Agency, Pathum Thani 12120, Thailand

<sup>d</sup> Center of Excellence in Catalysis and Catalytic Reaction Engineering, Department of Chemical Engineering, Faculty of Engineering, Chulalongkorn University, Bangkok 10330, Thailand

<sup>e</sup> Bio-Circular-Green-economy Technology & Engineering Center, BCGeTEC, Department of Chemical Engineering, Faculty of Engineering, Chulalongkorn University, Bangkok 10330, Thailand

\* To whom correspondence should be addressed.

Tel.: +66(0)2 889-2138 ext. 6101-3; Fax: +66(0)2 889-2138 ext. 6129

E-mail address: atthapon.sri@mahidol.edu (A. Srifa)

**Table S1** Mass balance of the liquid product after reaction (200 °C, 2 h, and 20 bar H<sub>2</sub>) over the Cu, Cu<sub>1</sub>Re<sub>0.14</sub>, and Re catalysts.

| Sample                             | Mass balance (%) |
|------------------------------------|------------------|
| Cu                                 | 99.2             |
| Cu <sub>1</sub> Re <sub>0.14</sub> | 99.7             |
| Re                                 | 99.3             |

**Table S2** Liquid product composition by GC-MS analysis obtained from the reaction using Cu and Cu<sub>1</sub>Re<sub>0.14</sub> catalysts at reaction temperature of 200°C, initial H<sub>2</sub> pressure of 20 bar and time for 2 h.

| Product                    | % Area by GC-MS analysis |                                    |
|----------------------------|--------------------------|------------------------------------|
|                            | Cu                       | Cu <sub>1</sub> Re <sub>0.14</sub> |
| 2-Methylfuran              | 31.8                     | 46.1                               |
| 2-Methyltetrahydrofuran    | 6.4                      | 11.6                               |
| 1-Pentanol                 | 2.8                      | 3.2                                |
| Furfuryl alcohol           | 34.5                     | 10.9                               |
| Tetrahydrofurfuryl alcohol | 1.8                      | 1.8                                |
| 1,2-Pentanediol            | 6.2                      | 6.3                                |
| 1,4-Pentanediol            | 8.5                      | 14.6                               |
| Isopropyl furfuryl ether   | 8.0                      | 5.6                                |

**Table S3** Metal contents of the catalysts as determined by XRF analysis.

| Sample                             | Metal content |      | Re/Cu      |
|------------------------------------|---------------|------|------------|
|                                    | Re            | Cu   | mole ratio |
| (wt.%)                             |               |      |            |
| Cu                                 | 0             | 12.8 | -          |
| Cu <sub>1</sub> Re <sub>0.04</sub> | 1.4           | 11.3 | 0.04       |
| Cu <sub>1</sub> Re <sub>0.14</sub> | 4.0           | 9.6  | 0.14       |
| Cu <sub>1</sub> Re <sub>0.34</sub> | 7.2           | 7.2  | 0.34       |
| Re                                 | 15.7          | 0    | -          |

**Table S4** Metal content by SEM-EDS analysis of the fresh and spent  $\text{Cu}_1\text{Re}_{0.14}$  catalysts after the reaction test at a reaction temperature of 200 °C, initial  $\text{H}_2$  pressure of 20 bar, and reaction time for 2 h.

| Sample                              | Metal content by SEM-EDS analysis |     |
|-------------------------------------|-----------------------------------|-----|
|                                     | Cu                                | Re  |
|                                     | (wt.%)                            |     |
| Fresh $\text{Cu}_1\text{Re}_{0.14}$ | 9.5                               | 4.4 |
| Spent $\text{Cu}_1\text{Re}_{0.14}$ | 10.1                              | 4.5 |

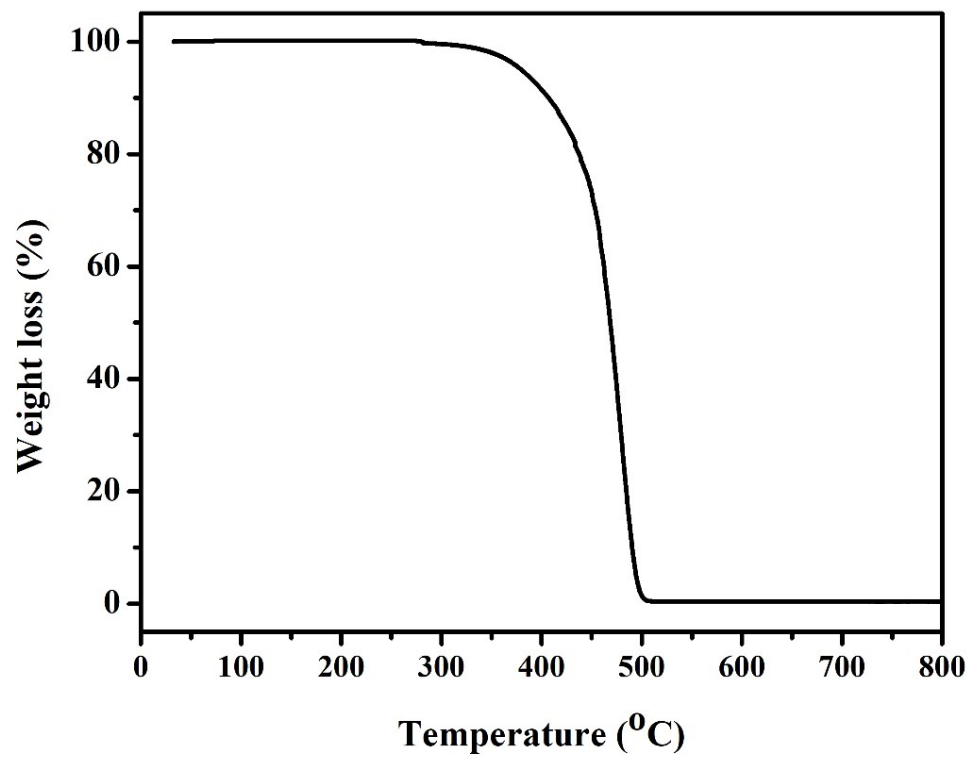

**Fig. S1** TGA profile of the  $\text{NH}_4\text{ReO}_4$  precursor decomposition in air.

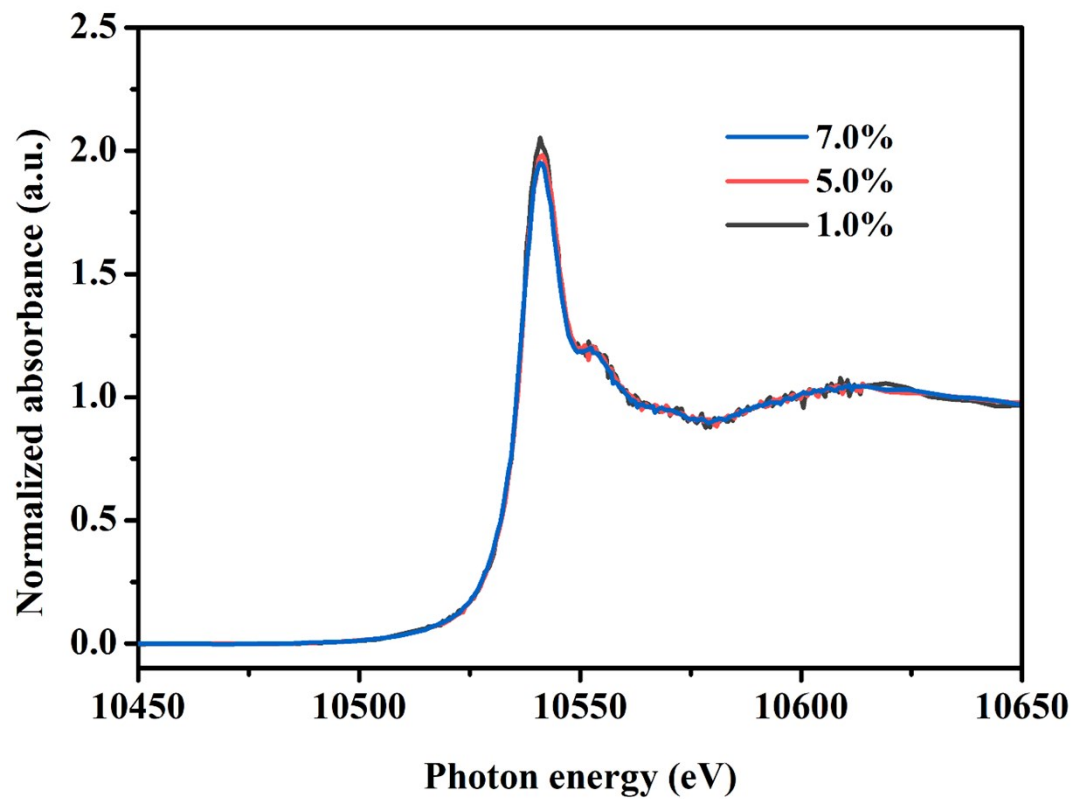

Fig. S2 Representative normalized Re L<sub>3</sub>-edge XANES spectra of the NH<sub>4</sub>ReO<sub>4</sub> standard with different Re contents.

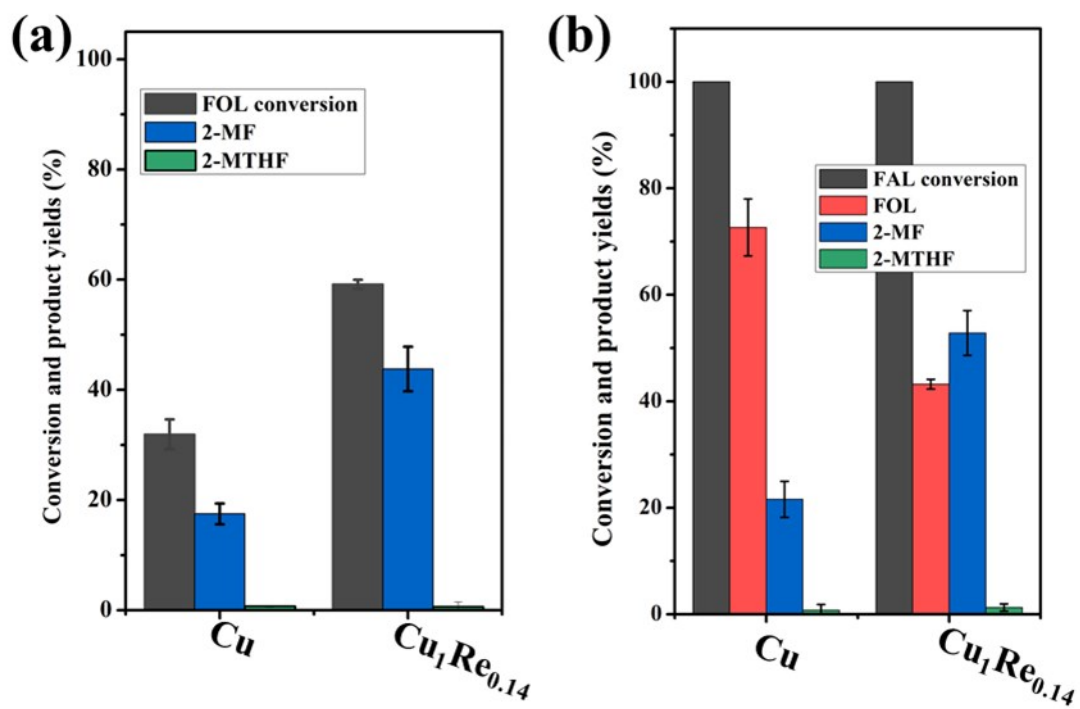

**Fig. S3** Comparative study of Cu and Cu<sub>1</sub>Re<sub>0.14</sub> catalysts using (a) a primary intermediate FOL and (b) FAL as the reactants to generate the target 2-MF at a reaction temperature of 200 °C, initial H<sub>2</sub> pressure of 20 bar, and reaction time for 30 min. The catalyst loading was 20 wt.% based on initial mass of FAL.



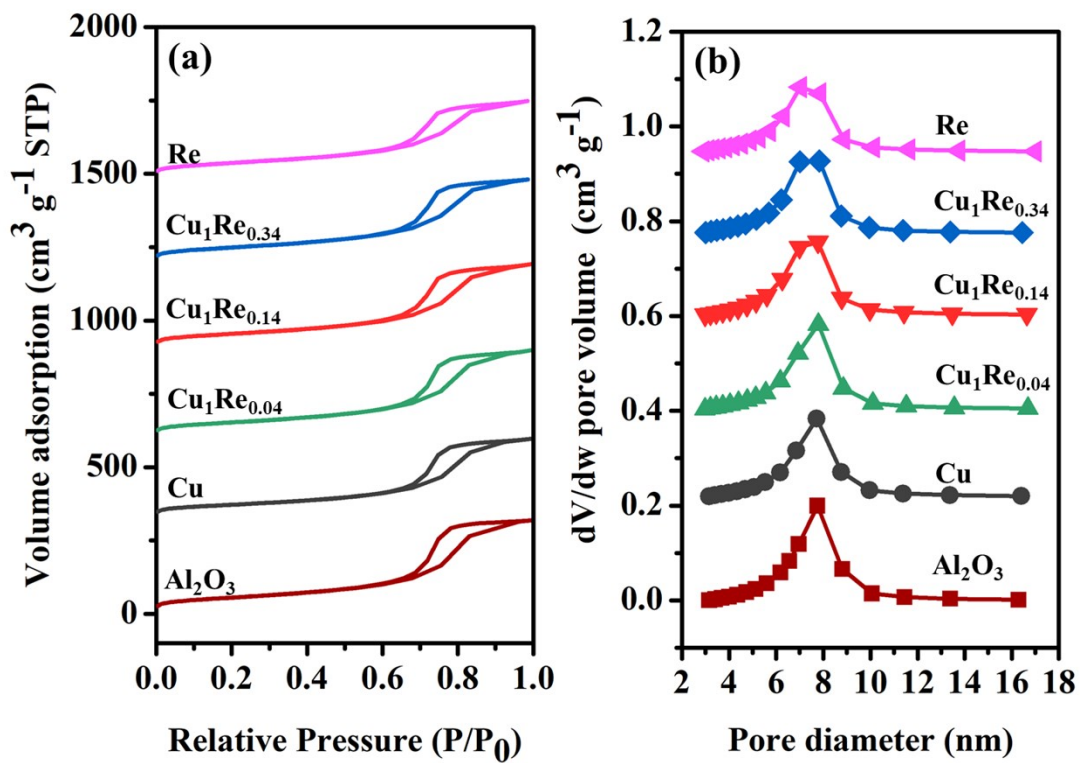

**Fig. S4** (a) N<sub>2</sub> adsorption and desorption isotherms and (b) pore size distribution of the  $\gamma$ -Al<sub>2</sub>O<sub>3</sub> and the calcined Cu, Cu<sub>1</sub>Re<sub>0.04</sub>, Cu<sub>1</sub>Re<sub>0.14</sub>, Cu<sub>1</sub>Re<sub>0.34</sub>, and Re samples.

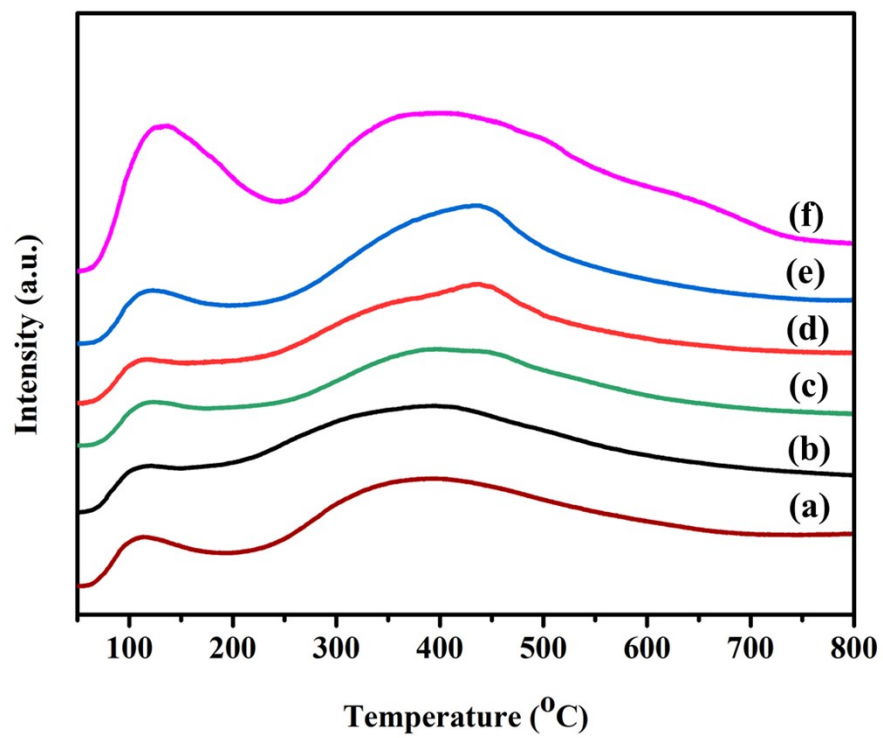

**Fig. S5** NH<sub>3</sub>-TPD profiles of the fresh (a)  $\gamma$ -Al<sub>2</sub>O<sub>3</sub>, (b) Cu, (c) Cu<sub>1</sub>Re<sub>0.04</sub>, (d) Cu<sub>1</sub>Re<sub>0.14</sub>, (e) Cu<sub>1</sub>Re<sub>0.34</sub>, and (f) Re catalysts.

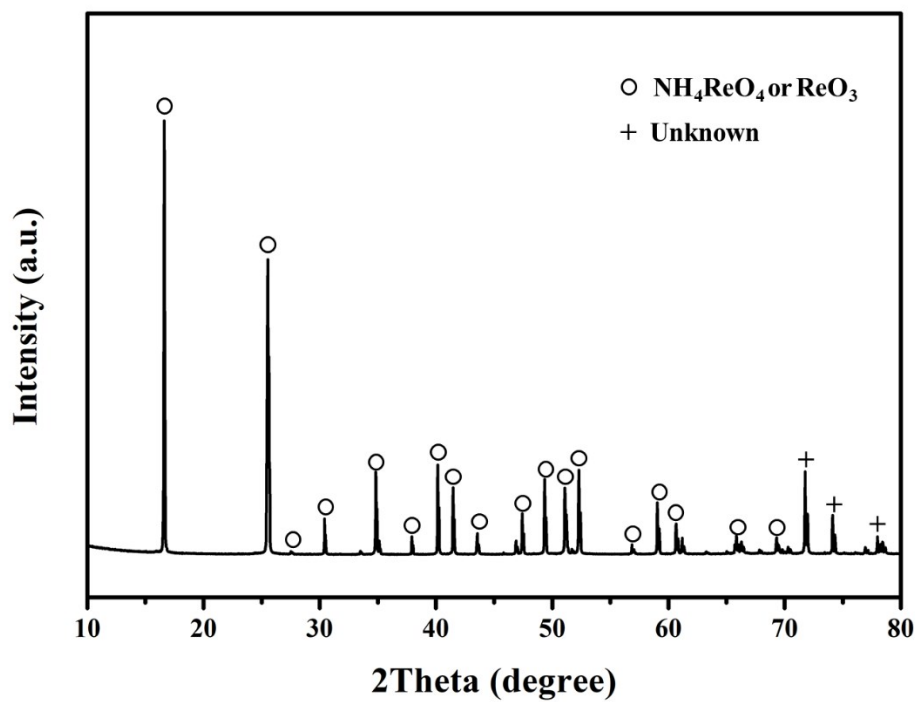

**Fig. S6** XRD pattern of the  $\text{NH}_4\text{ReO}_4$  precursor calcined at 300 °C for 3 h.

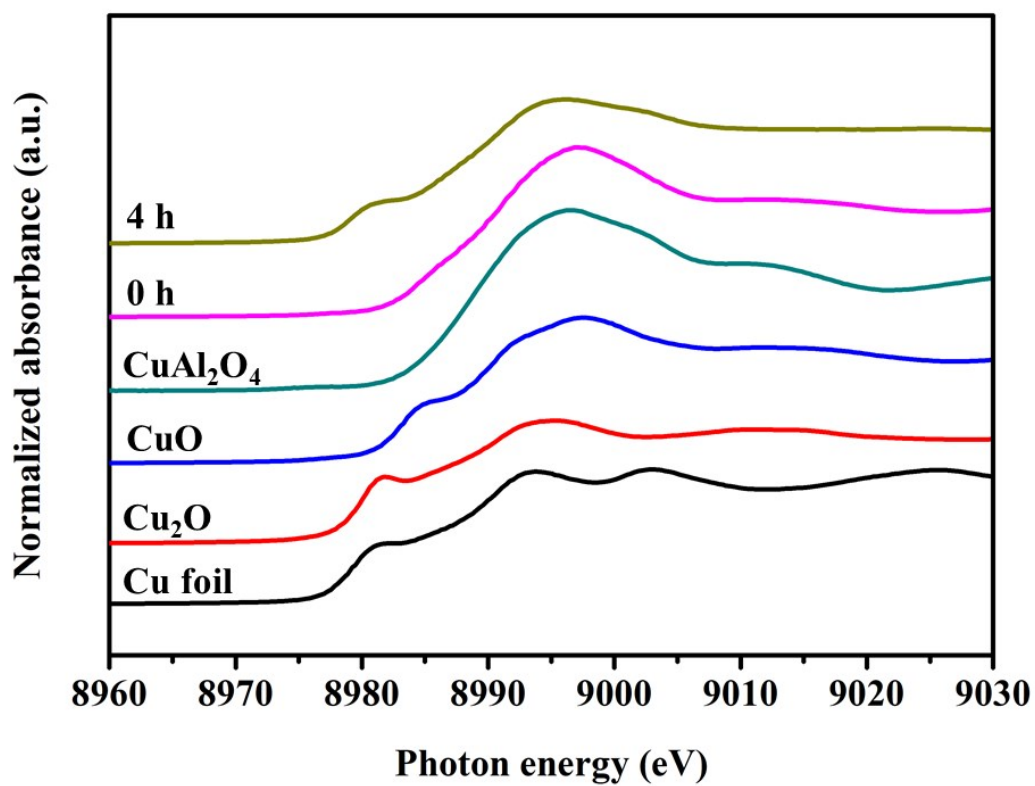

**Fig. S7** The *ex situ* normalized Cu K-edge XANES spectra of the Cu catalyst with different reaction times (0 and 4 h) at a reaction temperature of 200 °C and initial H<sub>2</sub> pressure of 20 bar, and the Cu foil, Cu<sub>2</sub>O, CuO, and CuAl<sub>2</sub>O<sub>4</sub> standards.

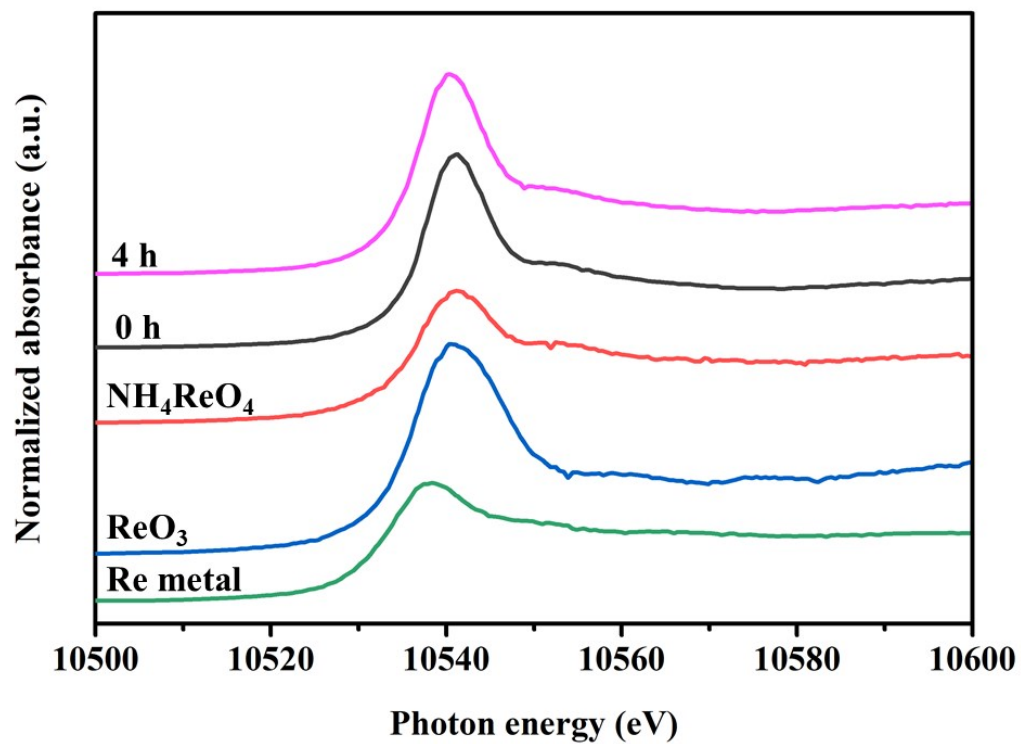

**Fig. S8** The *ex situ* normalized Re L<sub>3</sub>-edge XANES spectra of the Re catalyst with different reaction times (0 and 4 h) at a reaction temperature of 200 °C and initial H<sub>2</sub> pressure of 20 bar, and the Re metal, ReO<sub>3</sub>, and NH<sub>4</sub>ReO<sub>4</sub> standards.

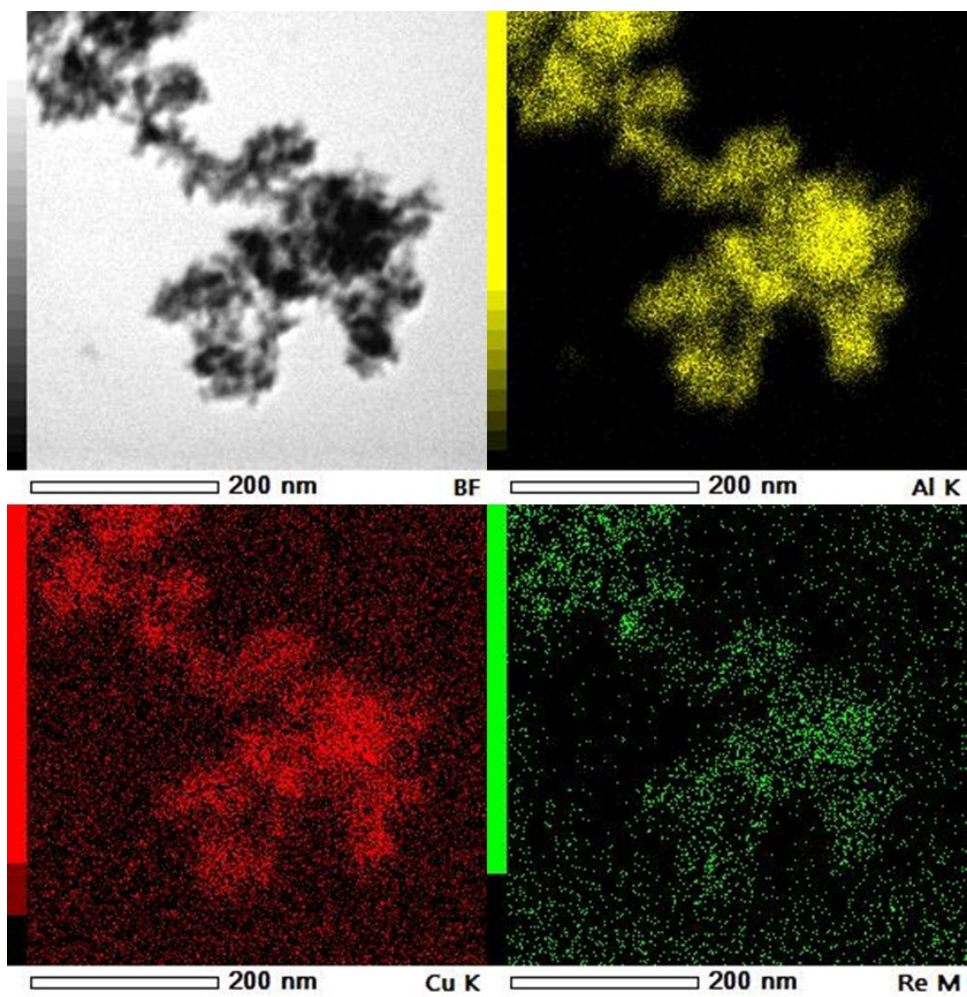

**Fig. S9** Representative EDS mapping of the spent  $\text{Cu}_1\text{Re}_{0.14}$  catalyst.

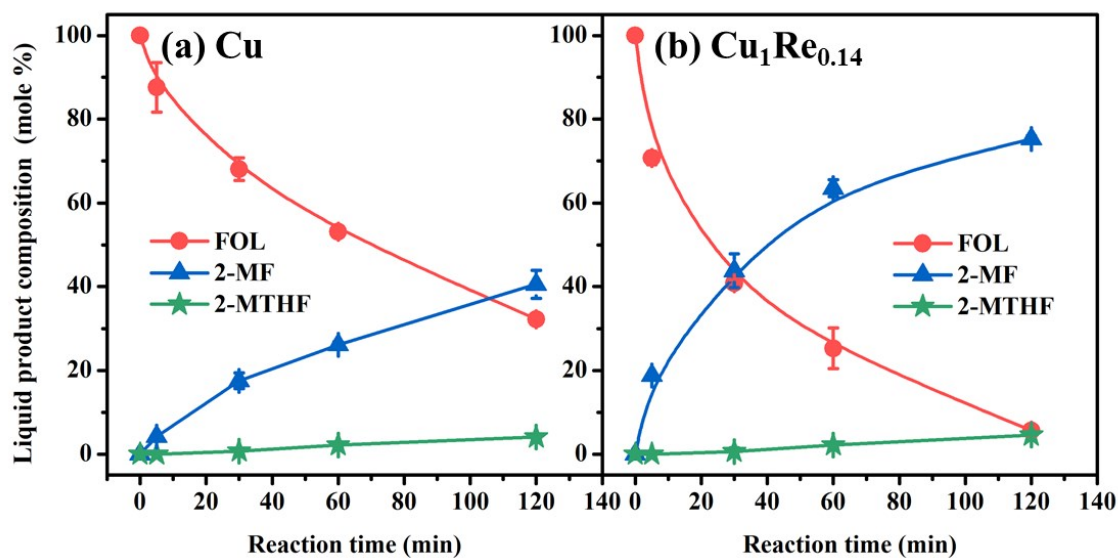

**Fig. S10** Influence of the reaction time (5–120 min) on the liquid product composition for the FOL hydrogenolysis at 200 °C over the (a) Cu and (b) Cu<sub>1</sub>Re<sub>0.14</sub> catalysts. The catalyst loading was 20 wt.% based on initial mass of FAL.

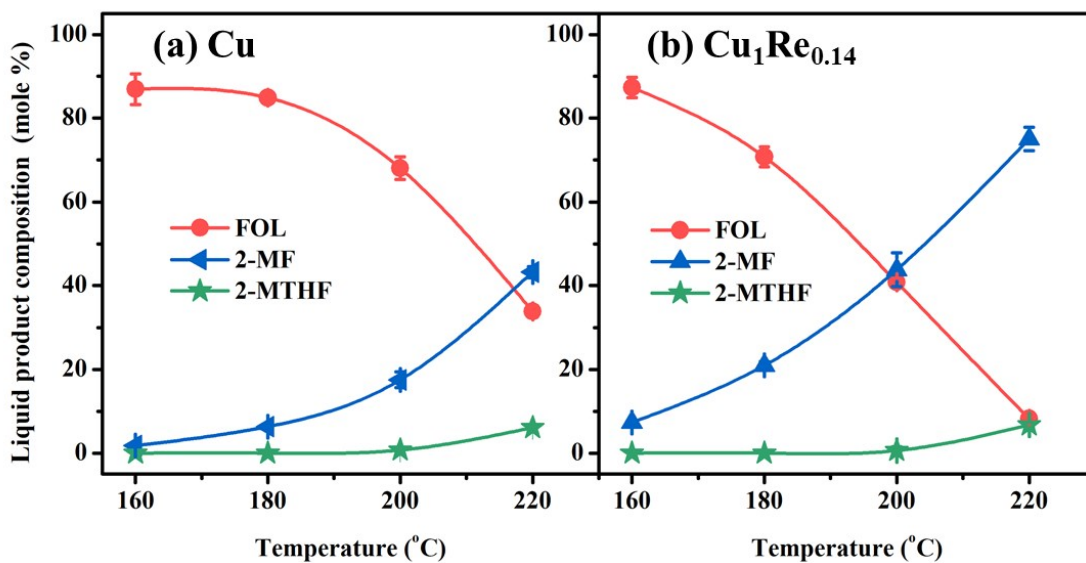

**Fig. S11** Influence of the reaction temperature (160-220 °C) on the liquid product composition in the FOL hydrogenolysis for 30 min over the (a) Cu and (b) Cu<sub>1</sub>Re<sub>0.14</sub> catalysts. The catalyst loading was 20 wt.% based on initial mass of FAL.



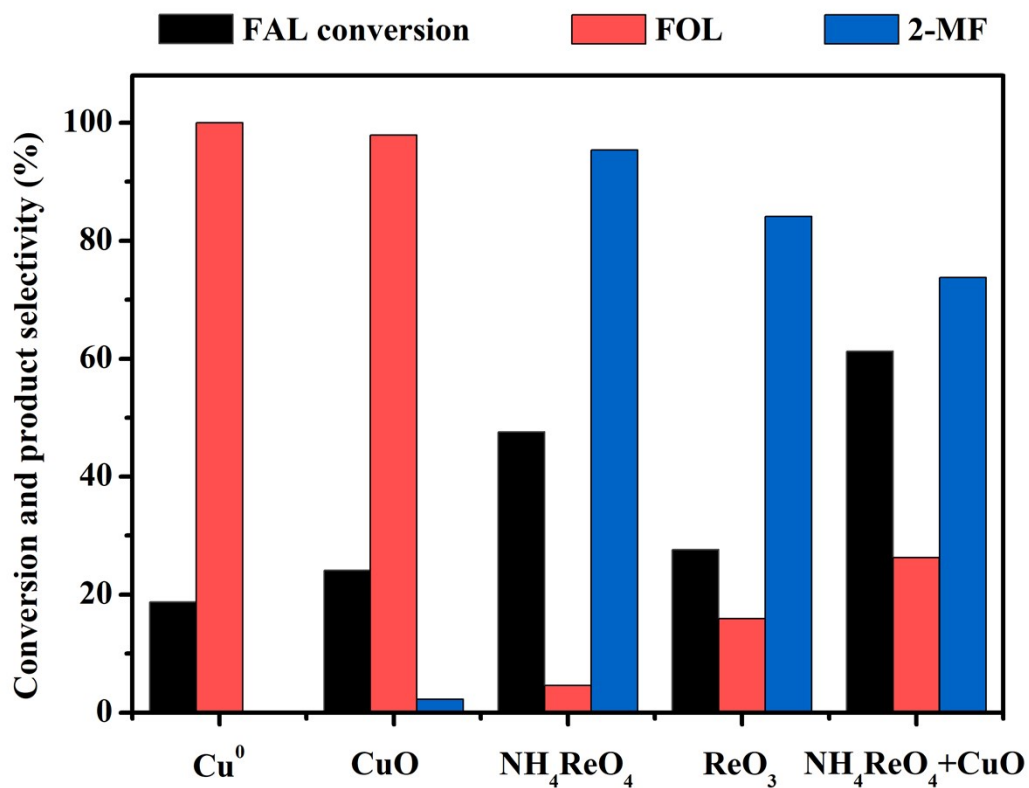

**Fig. S12** Catalytic performance for FAL hydrogenolysis over Cu, CuO, ReO<sub>3</sub>, NH<sub>4</sub>ReO<sub>4</sub>, and mixed NH<sub>4</sub>ReO<sub>4</sub>-CuO species at a reaction temperature of 200 °C, initial H<sub>2</sub> pressure of 20 bar, and reaction time for 30 min. The catalyst loading was 20 wt.% based on initial mass of FAL.

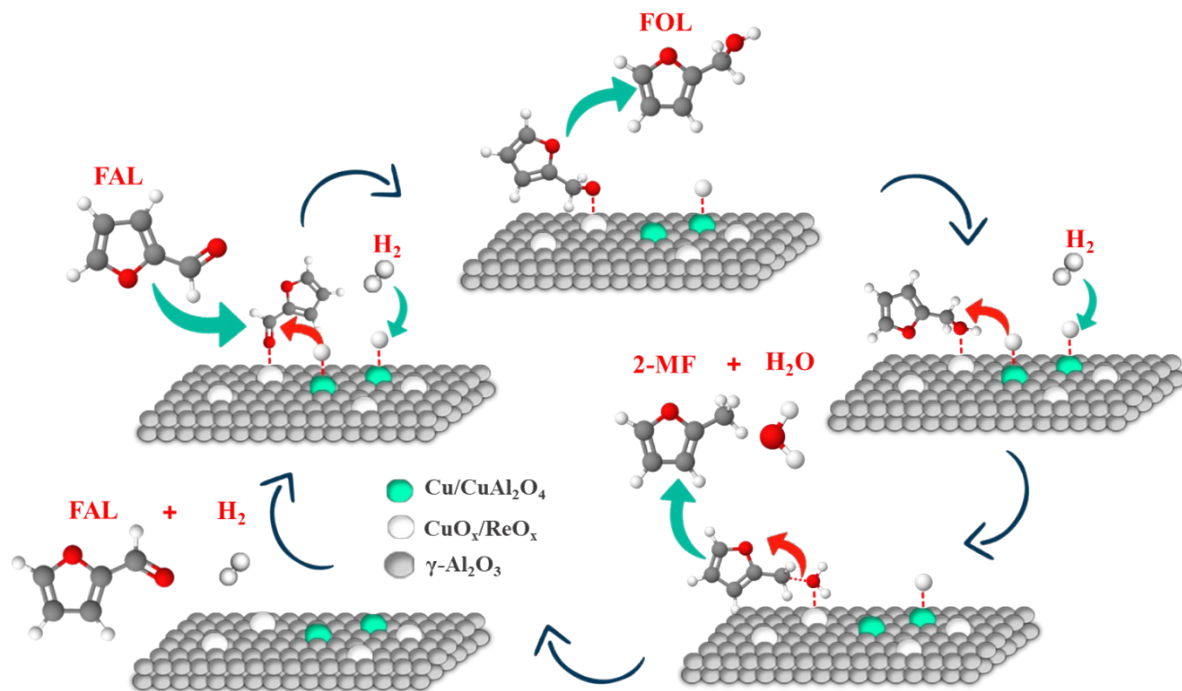

**Fig. S13** Proposed reaction mechanism for FAL hydrogenolysis over the  $\text{Cu}_1\text{Re}_{0.14}$  catalyst.

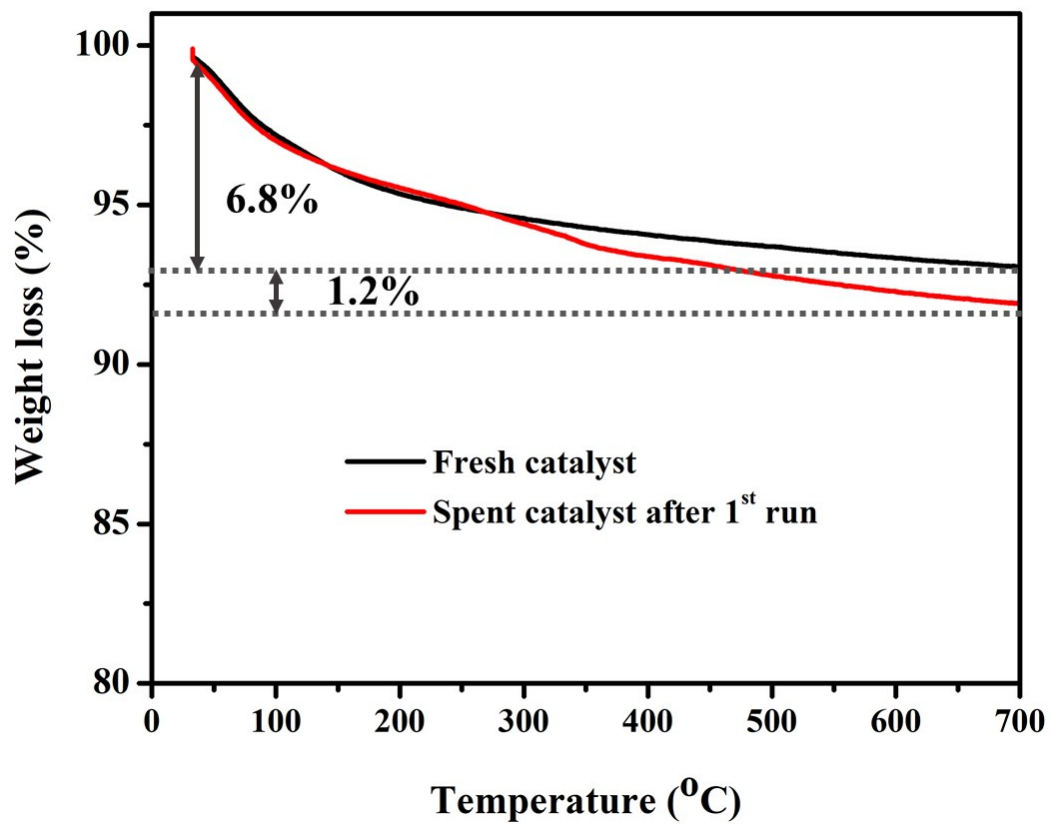

Fig. S14 TGA profiles of the fresh and spent Cu catalyst in air.
